# Supplementary material
Source: PubMed Central journal article supplement (PMC506808)
Supplement: nar_32_13_3967__1.pdf [file nar_32_13_3967__1.pdf]

**Supplementary Material for:**

**Heat Capacity Changes in RNA Folding: Application of Perturbation  
Theory to Hammerhead Ribozyme Cold Denaturation**

Peter J. Mikulecky and Andrew L. Feig\*

Department of Chemistry, Indiana University, 800 E. Kirkwood Ave.,  
Bloomington, IN 47405

**Figure S1.**

A.

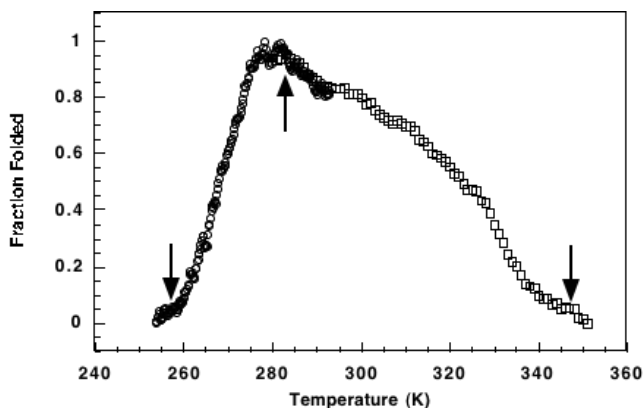

B.

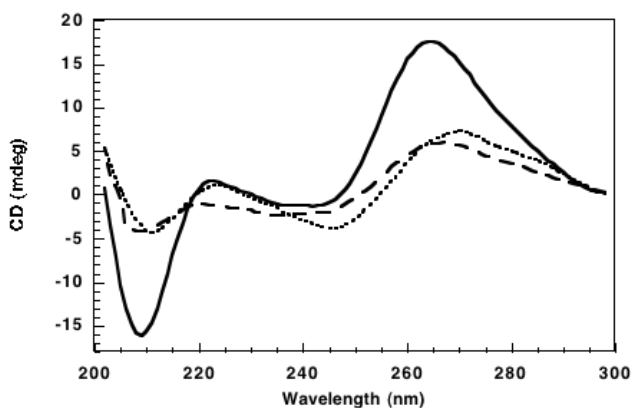

**Figure S1. Melting curves for hot- and cold denaturation of the same sample of HH16, and CD spectra of folded and denatured states.** (A) Melting curves for cold refolding (circles) and hot unfolding (squares) of the same sample of HH16, collected by CD at 265 nm. Datasets overlap in the region of 278-293 K. Arrows indicate temperatures at which wavelength spectra were taken of the sample. (B) CD spectra of cold-denatured (dotted line), folded (solid line), and heat-denatured (dashed line) states of HH16, collected at 257 K, 283 K, and 347 K, respectively.

HH16 ( $A_{260} = 0.5$ ) in 40% methanol, 500 mM NaCl, 50 mM sodium cacodylate pH 6.6 was cold-denatured by slow cooling to 253 K, ramping at 8 min per degree within a jacketed cell attached to a circulating bath of 90% methanol. The sample was then refolded by ramping up the temperature to 293 K, again at 8 min per degree, monitoring the CD signal at 265 nm. The sample was transferred to a temperature-controlled Peltier cell, and allowed to equilibrate at 278 K. Then, the sample was heat-denatured by ramping at 0.5 K per min up to 353 K, monitoring the CD signal at 265 nm.
